# Supplementary material
Source: HighWire-hosted journal article supplement (https://www.jrheum.org/highwire/filestream/41898/field_highwire_adjunct_files/0/210912DataSuppl.pdf)
Supplement: 210912DataSuppl.pdf [file 210912DataSuppl.pdf]

**Supplementary Table S1.** ACR response rates at week 16 by number of tender and swollen joints at baseline (nonresponder imputation)

| Variable, n (%) | Tender and swollen joints < 10 at baseline |                                   |                    | Tender and swollen joints ≥ 10 at baseline |                                   |                     |
|-----------------|--------------------------------------------|-----------------------------------|--------------------|--------------------------------------------|-----------------------------------|---------------------|
|                 | Secukinumab<br>300 mg<br>(n = 13)          | Secukinumab<br>150 mg<br>(n = 19) | Placebo<br>(n = 6) | Secukinumab<br>300 mg<br>(n = 56)          | Secukinumab<br>150 mg<br>(n = 48) | Placebo<br>(n = 24) |
| ACR20           | 10 (76.9)                                  | 8 (42.1)                          | 1 (16.7)           | 27 (48.2)                                  | 18 (37.5)                         | 5 (20.8)            |
| ACR50           | 7 (53.8)                                   | 6 (31.6)                          | 0                  | 12 (21.4)                                  | 13 (27.1)                         | 0                   |
| ACR70           | 4 (30.8)                                   | 3 (15.8)                          | 0                  | 8 (14.3)                                   | 6 (12.5)                          | 0                   |

ACR = American College of Rheumatology.

**Supplementary Table S2.** Baseline DAPSA scores, change from baseline to week 16 in DAPSA scores, and achievement of DAPSA-based remission and LDA at week 16 by number of tender and swollen joints at baseline

| Variable                                                       | Tender and swollen joints < 10 at baseline |                                    |                    | Tender and swollen joints ≥ 10 at baseline |                                    |                     |
|----------------------------------------------------------------|--------------------------------------------|------------------------------------|--------------------|--------------------------------------------|------------------------------------|---------------------|
|                                                                | Secukinumab<br>300 mg<br>(n = 13)          | Secukinumab<br>150 mg<br>(n = 19)* | Placebo<br>(n = 6) | Secukinumab<br>300 mg<br>(n = 56)          | Secukinumab<br>150 mg<br>(n = 48)* | Placebo<br>(n = 24) |
| Baseline DAPSA score<br>(mean, SD)                             | 18.9 (5.9)                                 | 18.2 (5.3)                         | 18.5 (8.3)         | 68.7 (30.2)                                | 66.2 (27.0)                        | 66.4 (22.1)         |
| Change from baseline in<br>DAPSA score, mean (SD) <sup>†</sup> | -11.3 (8.2)                                | -7.5 (10.7)                        | -3.5 (8.2)         | -27.6 (29.8)                               | -26.1 (29.3)                       | -12.3 (23.8)        |
| DAPSA ≤4 (remission), n (%) <sup>‡</sup>                       | 6 (46.2)                                   | 7 (36.8)                           | 1 (16.7)           | 6 (10.7)                                   | 0                                  | 0                   |
| DAPSA >4 and ≤14 (LDA),<br>n (%) <sup>‡</sup>                  | 4 (30.8)                                   | 5 (26.3)                           | 1 (16.7)           | 7 (12.5)                                   | 10 (20.8)                          | 2 (8.3)             |

DAPSA = Disease Activity in Psoriatic Arthritis; LDA = low disease activity.

\* Includes patients with up-titration to secukinumab 300 mg at week 16.

† Analysis was conducted using last-observation-carried-forward.

‡ Analysis was conducted using nonresponder imputation.

**Supplementary Figure S1.** Proportions of patients achieving ACR responses at weeks 16 and 52 by methotrexate use at baseline (nonresponder imputation)

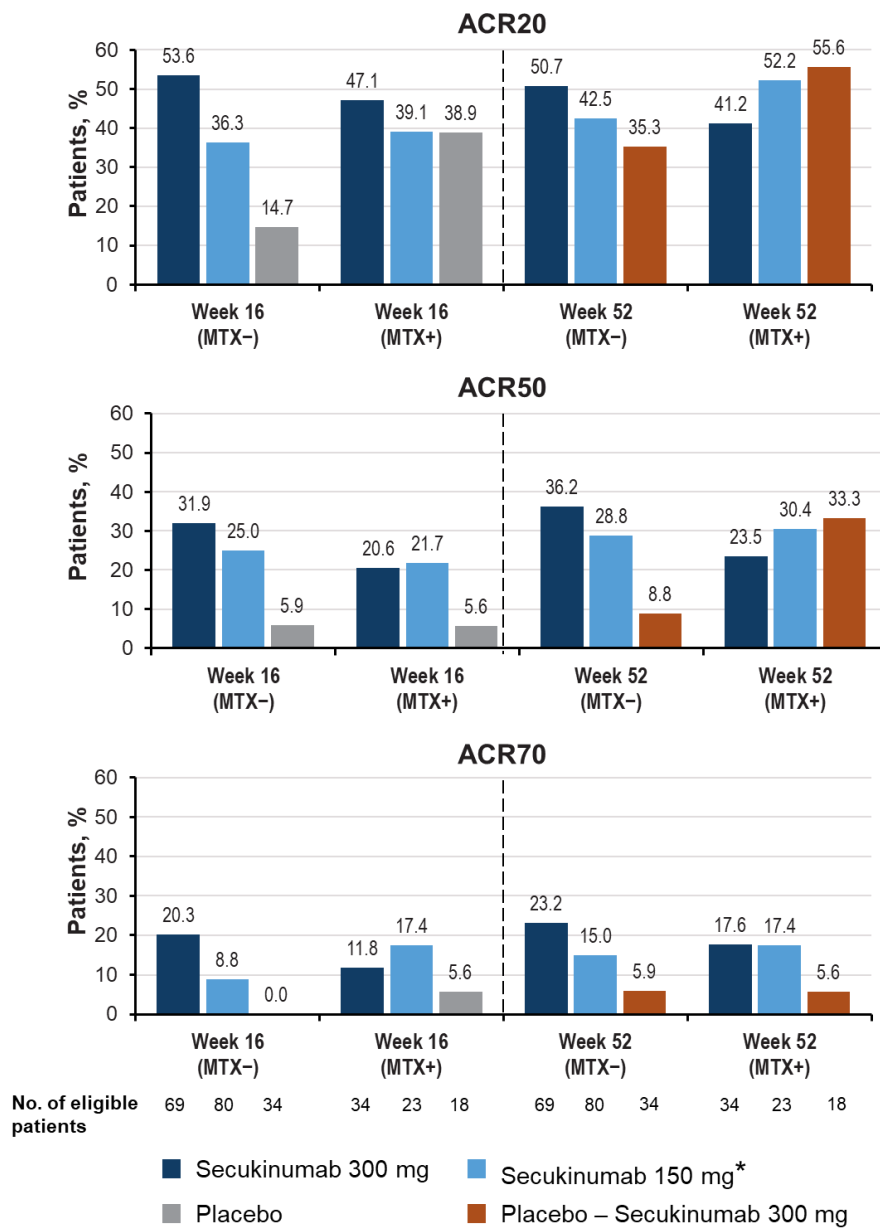

ACR = American College of Rheumatology; MTX = methotrexate.

\* Includes patients who uptitrated to secukinumab 300 mg at weeks 16, 28, or 40.

**Supplementary Table S3.** Select secukinumab efficacy variables at week 52

| <b>Primary efficacy variable</b>                            |                                             |                                                         |                                         |
|-------------------------------------------------------------|---------------------------------------------|---------------------------------------------------------|-----------------------------------------|
|                                                             | <b>Secukinumab<br/>300 mg<br/>(n = 103)</b> | <b>Secukinumab<br/>150 mg<br/>(n = 103)<sup>†</sup></b> | <b>Placebo<br/>(n = 52)<sup>‡</sup></b> |
| <b>Outcome, n/N (%)<sup>*</sup></b>                         |                                             |                                                         |                                         |
| ACR20, n (%)                                                | 49 (47.6)                                   | 46 (44.7)                                               | 12 (23.1)                               |
| <b>Secondary and exploratory binary efficacy variables</b>  |                                             |                                                         |                                         |
|                                                             | <b>Secukinumab<br/>300 mg<br/>(n = 103)</b> | <b>Secukinumab<br/>150 mg<br/>(n = 103)<sup>†</sup></b> | <b>Placebo<br/>(n = 52)<sup>‡</sup></b> |
| <b>Outcome, n/N (%)<sup>*</sup></b>                         |                                             |                                                         |                                         |
| ACR50, n (%)                                                | 33 (32.0)                                   | 30 (29.1)                                               | 3 (5.8)                                 |
| ACR70, n (%)                                                | 22 (21.4)                                   | 16 (15.5)                                               | 1 (1.9)                                 |
| Resolution of enthesitis (LEI + SPARCC), n (%) <sup>§</sup> | 28/74 (37.8)                                | 33/76 (43.4)                                            | 7/39 (17.9)                             |
| Resolution of dactylitis, n (%) <sup>¶</sup>                | 29/49 (59.2)                                | 28/52 (53.8)                                            | 4/23 (17.4)                             |
| PASI75, n (%) <sup>#</sup>                                  | 53/79 (67.1)                                | 49/83 (59.0)                                            | 7/43 (16.3)                             |
| PASI90, n (%) <sup>#</sup>                                  | 38/79 (48.1)                                | 39/83 (47.0)                                            | 4/43 (9.3)                              |
| PASI100, n (%) <sup>#</sup>                                 | 25/79 (31.6)                                | 31/83 (37.3)                                            | 1/43 (2.3)                              |

|                                                                |                                             |                                                         |                                         |
|----------------------------------------------------------------|---------------------------------------------|---------------------------------------------------------|-----------------------------------------|
| MDA, n (%)                                                     | 24 (23.3)                                   | 30 (29.1)                                               | 2 (3.8)                                 |
| Tender joint response<br>(TJC $\leq$ 1)                        | 29 (28.2)                                   | 30 (29.1)                                               | 3 (5.8)                                 |
| Swollen joint response<br>(SJC $\leq$ 1)                       | 44 (42.7)                                   | 47 (45.6)                                               | 8 (15.4)                                |
| <b>Secondary and exploratory continuous efficacy variables</b> |                                             |                                                         |                                         |
| <b>Outcome, change<br/>from baseline, mean<br/>(SE)**</b>      | <b>Secukinumab<br/>300 mg<br/>(n = 103)</b> | <b>Secukinumab<br/>150 mg<br/>(n = 103)<sup>†</sup></b> | <b>Placebo<br/>(n = 52)<sup>‡</sup></b> |
| DAS28-CRP                                                      | -1.9 (0.14)                                 | -1.7 (0.17)                                             | -0.3 (0.16)                             |
| PASDAS                                                         | -2.9 (0.17)                                 | -2.8 (0.22)                                             | -0.6 (0.19)                             |
| HAQ-DI                                                         | -0.4 (0.06)                                 | -0.4 (0.07)                                             | -0.2 (0.06)                             |
| SF-12 mental<br>component score                                | 3.6 (1.13)                                  | 2.8 (1.06)                                              | 2.7 (1.54)                              |
| SF-12 physical<br>component score                              | 6.7 (0.97)                                  | 6.7 (1.04)                                              | 2.7 (1.41)                              |
| RAPID3                                                         | -6.4 (0.64)                                 | -5.6 (0.75)                                             | -1.1 (0.74)                             |

ACR = American College of Rheumatology; ANCOVA = analysis of covariance; DAS28-CRP = Disease Activity Score in 28 joints using C-reactive protein; HAQ-DI = Health Assessment Questionnaire – Disability Index; LEI = Leeds Enthesitis Index; MDA = minimal disease activity; PASDAS = Psoriatic Arthritis Disease Activity Score; PASI = Psoriasis Area and Severity Index; PBO = placebo; RAPID3 = Routine Assessment of Patient Index Data 3; SE = standard error; SF-12 = Short Form 12-question Health

Survey; SJC = swollen joint count; SPARCC = Spondyloarthritis Research Consortium of Canada Enthesitis Index; TJC = tender joint count.

\* Analysis was conducted using nonresponder imputation.

† Includes patients with uptitration to secukinumab 300 mg at weeks 16, 28, or 40.

‡ Up to week 16.

§ Results are from the combined LEI and SPARCC subset. Enthesitis was determined in patients who had an enthesitis score  $\geq 1$  when sites from LEI and SPARCC were assessed together at baseline: secukinumab 300 mg, n = 74; secukinumab 150 mg, n = 76; placebo, n = 39.

¶ Dactylitis was determined in patients who had a Leeds Dactylitis Index  $\geq 1$  at baseline: secukinumab 300 mg, n = 49; secukinumab 150 mg, n = 52; placebo, n = 23.

# Results are from patients having psoriatic skin involvement in  $\geq 3\%$  of their body surface area at baseline: secukinumab 300 mg, n = 79; secukinumab 150 mg, n = 83; placebo, n = 43.

\*\* Summary statistics based on observed data.

**Supplementary Figure S2.** Proportions of patients achieving ACR responses by BMI at weeks 16 and 52 (nonresponder imputation)

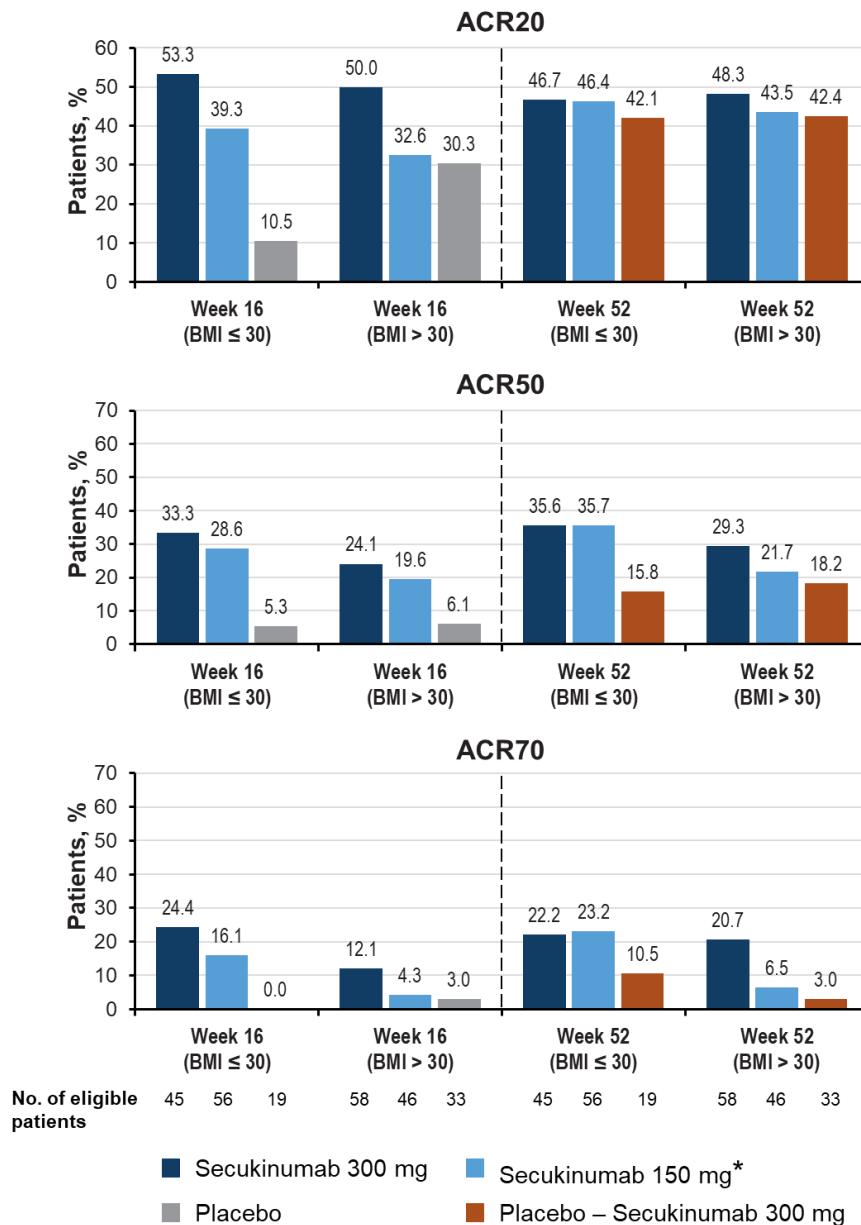

ACR = American College of Rheumatology; BMI = body mass index.

\* Includes patients with uptitration to secukinumab 300 mg at weeks 16, 28, or 40.



**Supplementary Figure S3.** Proportions of patients achieving PASI responses by BMI at baseline (nonresponder imputation)\*

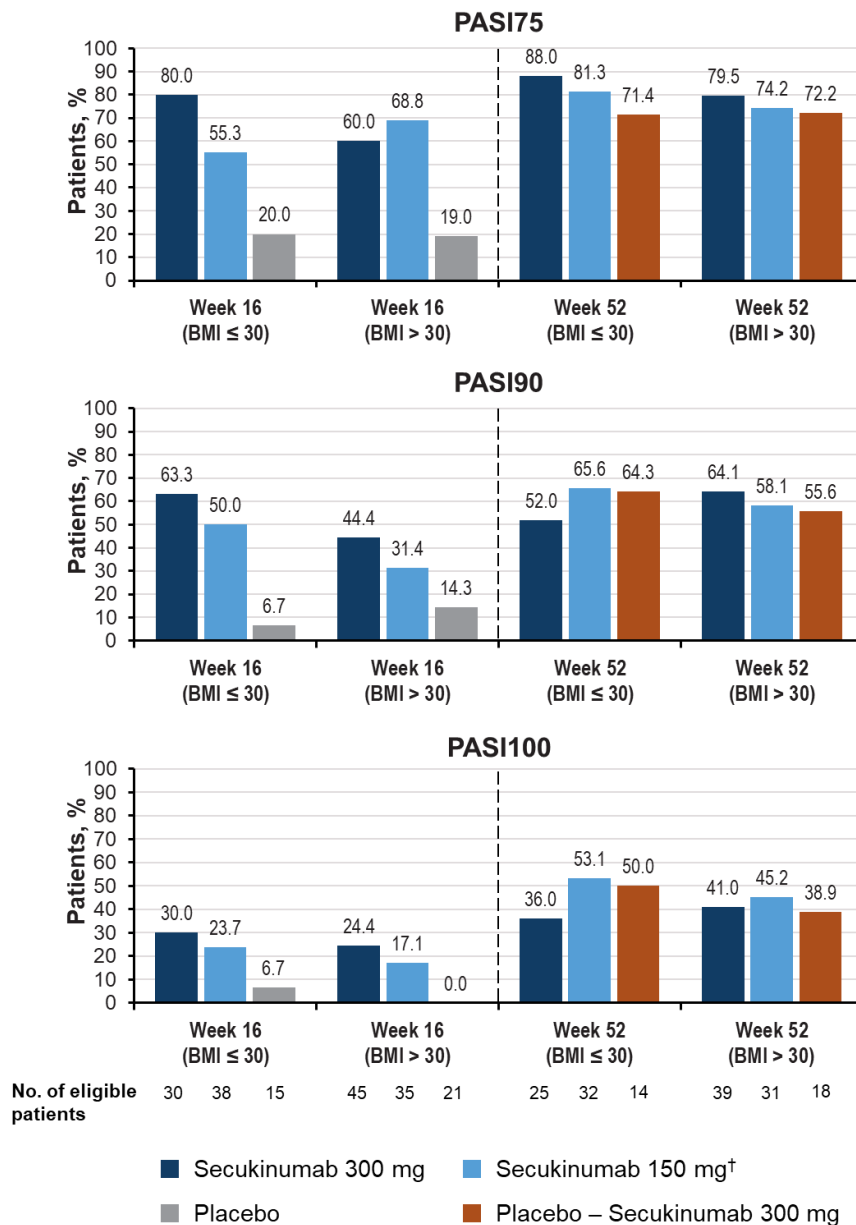

BMI = body mass index; PASI = Psoriasis Area and Severity Index.

\* Includes patients with psoriasis involving  $\geq 3\%$  of the body surface area.

<sup>†</sup> Includes patients with uptitration to secukinumab 300 mg after week 16.

**Supplementary Table S4.** Serious adverse events up to week 16

| <b>Patients with serious AEs, n (%)</b> | <b>Secukinumab 300 mg<br/>(n = 103)</b> | <b>Secukinumab 150 mg<br/>(n = 103)</b> | <b>Placebo<br/>(n = 52)</b> |
|-----------------------------------------|-----------------------------------------|-----------------------------------------|-----------------------------|
| Pubic pain                              | 1 (1.0)                                 | 0                                       | 0                           |
| Seizure                                 | 1 (1.0)                                 | 0                                       | 0                           |
| Cardiac arrest                          | 0                                       | 0                                       | 1 (1.9)                     |
| Myocardial infarction                   | 0                                       | 1 (1.0)                                 | 0                           |
| Atypical pneumonia                      | 0                                       | 0                                       | 1 (1.9)                     |
| Ischemic stroke                         | 0                                       | 0                                       | 1 (1.9)                     |
| Syncope                                 | 0                                       | 1 (1.0)                                 | 0                           |
| Asthma                                  | 0                                       | 1 (1.0)                                 | 0                           |
| Pulmonary thrombosis                    | 0                                       | 1 (1.0)                                 | 0                           |
| Thrombosis                              | 0                                       | 1 (1.0)                                 | 0                           |

AE = adverse event.

**Supplementary Table S5.** Adverse events up to week 52

| <b>Patients with AEs, n (%)</b>                         | <b>Any secukinumab<br/>300 mg*<br/>(n = 197)</b> | <b>Any secukinumab<br/>150 mg†<br/>(n = 103)</b> | <b>Any<br/>secukinumab‡<br/>(n = 258)</b> |
|---------------------------------------------------------|--------------------------------------------------|--------------------------------------------------|-------------------------------------------|
| Any AE                                                  | 144 (73.1)                                       | 69 (67.0)                                        | 179 (69.4)                                |
| Serious AEs                                             | 19 (9.6)                                         | 8 (7.8)                                          | 22 (8.5)                                  |
| Death                                                   | 1 (0.5)                                          | 0                                                | 1 (0.4)                                   |
| Discontinuation due to AEs                              | 8 (4.1)                                          | 1 (1.0)                                          | 8 (3.1)                                   |
| Common AEs (in ≥ 3% of patients in any treatment group) |                                                  |                                                  |                                           |
| Upper respiratory tract infection                       | 27 (13.7)                                        | 14 (13.6)                                        | 33 (12.8)                                 |
| Diarrhea                                                | 15 (7.6)                                         | 7 (6.8)                                          | 20 (7.8)                                  |
| Urinary tract infection                                 | 11 (5.6)                                         | 6 (5.8)                                          | 15 (5.8)                                  |
| Hypertension                                            | 11 (5.6)                                         | 7 (6.8)                                          | 14 (5.4)                                  |
| Sinusitis                                               | 12 (6.1)                                         | 4 (3.9)                                          | 14 (5.4)                                  |
| Arthralgia                                              | 11 (5.6)                                         | 6 (5.8)                                          | 13 (5.0)                                  |
| Back pain                                               | 10 (5.1)                                         | 8 (7.8)                                          | 13 (5.0)                                  |
| Bronchitis                                              | 13 (6.6)                                         | 4 (3.9)                                          | 13 (5.0)                                  |
| Nasopharyngitis                                         | 11 (5.6)                                         | 6 (5.8)                                          | 13 (5.0)                                  |

|                                     |          |         |          |
|-------------------------------------|----------|---------|----------|
| Influenza                           | 9 (4.6)  | 4 (3.9) | 12 (4.7) |
| Headache                            | 7 (3.6)  | 5 (4.9) | 10 (3.9) |
| Musculoskeletal pain                | 10 (5.1) | 3 (2.9) | 10 (3.9) |
| Pain in extremity                   | 8 (4.1)  | 6 (5.8) | 10 (3.9) |
| Rash                                | 6 (3.0)  | 6 (5.8) | 10 (3.9) |
| Fatigue                             | 6 (3.0)  | 5 (4.9) | 9 (3.5)  |
| Psoriatic arthropathy               | 6 (3.0)  | 7 (6.8) | 9 (3.5)  |
| Abdominal pain                      | 6 (3.0)  | 3 (2.9) | 8 (3.1)  |
| Gastro-esophageal<br>reflux disease | 5 (2.5)  | 4 (3.9) | 7 (2.7)  |
| Muscle spasms                       | 5 (2.5)  | 4 (3.9) | 7 (2.7)  |
| Nausea                              | 3 (1.5)  | 4 (3.9) | 7 (2.7)  |
| Psoriasis                           | 3 (1.5)  | 5 (4.9) | 6 (2.3)  |
| Selected AEs of interest            |          |         |          |
| Candidiasis                         |          |         |          |
| <i>Candida</i> infection            | 1 (0.5)  | 2 (1.9) | 3 (1.2)  |
| Oral candidiasis                    | 1 (0.5)  | 0       | 1 (0.4)  |
| Vulvovaginal<br>candidiasis         | 1 (0.5)  | 0       | 1 (0.4)  |
| Skin <i>Candida</i>                 | 0        | 1 (1.0) | 1 (0.4)  |

|                                 |         |         |         |
|---------------------------------|---------|---------|---------|
| Major adverse cardiac events    |         |         |         |
| Ischemic stroke                 | 1 (0.5) | 0       | 1 (0.4) |
| Myocardial infarction           | 0       | 1 (1.0) | 1 (0.4) |
| Malignant or unspecified tumors |         |         |         |
| Breast cancer                   | 1 (0.5) | 0       | 1 (0.4) |
| Prostate cancer                 | 1 (0.5) | 0       | 1 (0.4) |
| Neutropenia                     | 1 (0.5) | 0       | 1 (0.4) |

AE = adverse event.

\* Any secukinumab 300-mg group included 103 patients who were assigned to receive secukinumab 300 mg in treatment period 1; 42 nonresponders who were randomized to secukinumab 150 mg in treatment period 1 and who switched to secukinumab 300 mg in treatment period 2; and all 52 patients randomized to placebo in treatment period 1 (of note, 6 patients never received secukinumab, including 1 patient in the placebo group who died due to cardiac arrest in treatment period 1).

† Any secukinumab 150-mg group included 103 patients who were randomized to secukinumab 150 mg in treatment period 1 (including 42 patients who switched to 300 mg and are also counted in the “any secukinumab 300 mg” group).

‡ Any secukinumab group included 103 patients randomized to secukinumab 300 mg in treatment period 1; 103 patients randomized to 150 mg in treatment period 1; and 52 patients randomized to placebo in treatment period 1 (of note, 6 patients had never received secukinumab, including 1 patient in the placebo group who died due to cardiac arrest in treatment period 1).

**Supplementary Table S6.** Serious adverse events up to week 52

| <b>n (%)</b>                | <b>Any secukinumab<br/>300 mg<br/>(n = 197)*</b> | <b>Any secukinumab<br/>150 mg<br/>(n = 103)†</b> | <b>Any secukinumab<br/>(n = 258)‡</b> |
|-----------------------------|--------------------------------------------------|--------------------------------------------------|---------------------------------------|
| Syncope                     | 2 (1.0)                                          | 1 (1.0)                                          | 2 (0.8)                               |
| Asthma                      | 2 (1.0)                                          | 1 (1.0)                                          | 2 (0.8)                               |
| Atrial fibrillation         | 1 (0.5)                                          | 0                                                | 1 (0.4)                               |
| Bradycardia                 | 1 (0.5)                                          | 0                                                | 1 (0.4)                               |
| Cardiac arrest              | 1 (0.5)                                          | 0                                                | 1 (0.4)                               |
| Abdominal pain              | 1 (0.5)                                          | 0                                                | 1 (0.4)                               |
| Diarrhea                    | 1 (0.5)                                          | 0                                                | 1 (0.4)                               |
| Diverticular<br>perforation | 1 (0.5)                                          | 0                                                | 1 (0.4)                               |
| Pancreatitis acute          | 1 (0.5)                                          | 0                                                | 1 (0.4)                               |
| Asthenia                    | 1 (0.5)                                          | 0                                                | 1 (0.4)                               |
| Non-cardiac chest<br>pain   | 1 (0.5)                                          | 0                                                | 1 (0.4)                               |
| Atypical pneumonia          | 1 (0.5)                                          | 0                                                | 1 (0.4)                               |
| Bronchitis                  | 1 (0.5)                                          | 0                                                | 1 (0.4)                               |
| Bursitis infective          | 1 (0.5)                                          | 1 (1.0)                                          | 1 (0.4)                               |

|                     |         |         |         |
|---------------------|---------|---------|---------|
| Cellulitis          | 1 (0.5) | 1 (1.0) | 1 (0.4) |
| Diverticulitis      | 1 (0.5) | 0       | 1 (0.4) |
| Intestinal sepsis   | 1 (0.5) | 0       | 1 (0.4) |
| Pneumonia           | 1 (0.5) | 0       | 1 (0.4) |
| Contusion           | 1 (0.5) | 0       | 1 (0.4) |
| Foot fracture       | 1 (0.5) | 0       | 1 (0.4) |
| Dehydration         | 1 (0.5) | 0       | 1 (0.4) |
| Gout                | 1 (0.5) | 1 (1.0) | 1 (0.4) |
| Arthritis           | 1 (0.5) | 0       | 1 (0.4) |
| Pubic pain          | 1 (0.5) | 0       | 1 (0.4) |
| Spondylitis         | 1 (0.5) | 1 (1.0) | 1 (0.4) |
| Breast cancer       | 1 (0.5) | 0       | 1 (0.4) |
| Prostate cancer     | 1 (0.5) | 0       | 1 (0.4) |
| Cerebral cyst       | 1 (0.5) | 0       | 1 (0.4) |
| Ischemic stroke     | 1 (0.5) | 0       | 1 (0.4) |
| Seizure             | 1 (0.5) | 0       | 1 (0.4) |
| Device loosening    | 1 (0.5) | 1 (1.0) | 1 (0.4) |
| Acute kidney injury | 1 (0.5) | 0       | 1 (0.4) |
| Dyspnea             | 1 (0.5) | 0       | 1 (0.4) |

|                       |         |         |         |
|-----------------------|---------|---------|---------|
| Pulmonary thrombosis  | 1 (0.5) | 1 (1.0) | 1 (0.4) |
| Rash                  | 1 (0.5) | 0       | 1 (0.4) |
| Deep vein thrombosis  | 1 (0.5) | 1 (1.0) | 1 (0.4) |
| Thrombosis            | 1 (0.5) | 1 (1.0) | 1 (0.4) |
| Myocardial infarction | 0       | 1 (1.0) | 1 (0.4) |
| Meningitis aseptic    | 0       | 1 (1.0) | 1 (0.4) |
| Lower limb fracture   | 0       | 1 (1.0) | 1 (0.4) |

\* Any secukinumab 300-mg group included 103 patients who were assigned to receive secukinumab 300 mg in treatment period 1; 42 nonresponders who were randomized to secukinumab 150 mg in treatment period 1 and who switched to secukinumab 300 mg in treatment period 2; and all 52 patients randomized to placebo in treatment period 1 (of note, 6 patients never received secukinumab, including 1 patient in the placebo group who died due to cardiac arrest in treatment period 1).

† Any secukinumab 150-mg group included 103 patients who were randomized to secukinumab 150 mg in treatment period 1 (including 42 patients who switched to 300 mg and are also counted in the “any secukinumab 300 mg” group).

‡ Any secukinumab group included 103 patients randomized to secukinumab 300 mg in treatment period 1; 103 patients randomized to 150 mg in treatment period 1; and 52 patients randomized to placebo in treatment period 1 (of note, 6 patients had never received secukinumab, including 1 patient in the placebo group who died due to cardiac arrest in treatment period 1).
